# Supplementary figures and images for: Disposable Electrochemical Aptasensor Based on Graphene Oxide-DNA Complex as Signal Amplifier towards Ultrasensitive Detection of Ochratoxin A
Source: MDPI journal article supplement (doi:10.3390/mi13060834), 2022-05-26

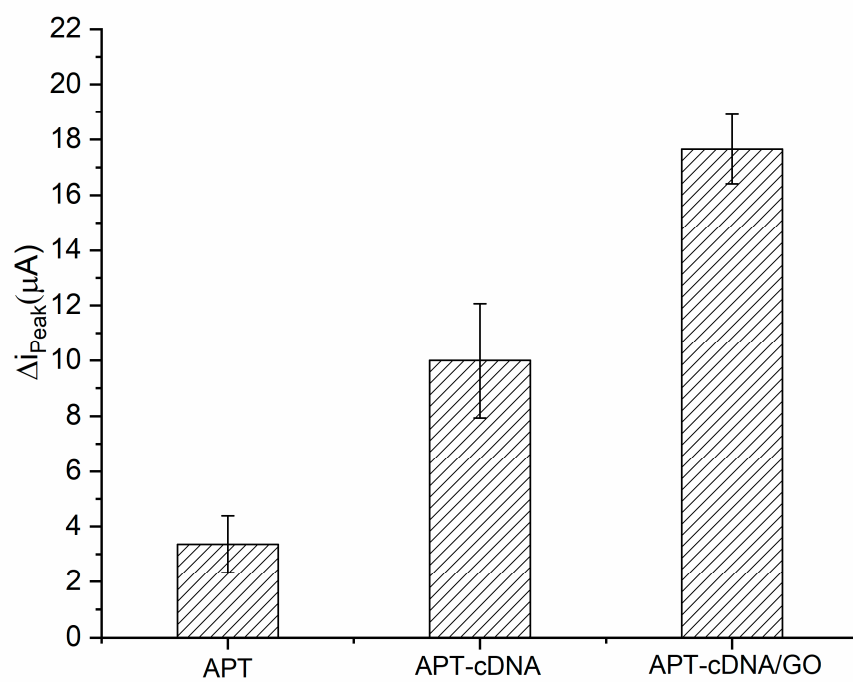

Figure S1 Comparison of three kinds of aptasensors

Supplement: s1 [file s1]
